# Supplementary material
Source: PubMed Central journal article supplement (PMC8733515)

**Supplemental Table 1.** Baseline characteristics by study arm

|                                                   | <b>Azithromycin</b> | <b>Amoxicillin</b> |
|---------------------------------------------------|---------------------|--------------------|
| N                                                 | 161                 | 140                |
| Age, months, mean (SD)                            | 16.9 (8.4)          | 16.5 (8.2)         |
| Female sex, N (%)                                 | 92 (57.1%)          | 77 (55.0%)         |
| Weight-for-height Z-score                         |                     |                    |
| Mean (SD)                                         | -3.0 (1.1)          | -3.1 (1.0)         |
| WHZ<-3, N (%)                                     | 84 (52.2%)          | 80 (57.1%)         |
| Mid-upper arm circumference                       |                     |                    |
| Mean (SD)                                         | 11.2 (0.4)          | 11.2 (0.5)         |
| MUAC<115 mm, N (%)                                | 136 (84.5%)         | 107 (76.4%)        |
| Weight-for-age Z-score                            |                     |                    |
| Mean (SD)                                         | -3.4 (1.0)          | -3.5 (1.1)         |
| WAZ<-3, N (%)                                     | 115 (71.4%)         | 96 (68.6%)         |
| Height-for-age Z-score                            |                     |                    |
| Mean (SD)                                         | -2.4 (1.5)          | -2.5 (1.6)         |
| HAZ<-3, N (%)                                     | 55 (34.2%)          | 58 (41.4%)         |
| Hemoglobin (N=164)                                |                     |                    |
| Mean (SD)                                         | 8.7 (1.5)           | 8.8 (1.6)          |
| <11.0 g/dl, N (%)                                 | 81 (94.2%)          | 71 (91.0%)         |
| Positive rapid diagnostic test for malaria, N (%) | 19 (11.8%)          | 17 (12.1%)         |
| Tympanic temperature >37.5°C                      | 6 (3.7%)            | 12 (8.6%)          |

**Supplementary Table 2.** Malaria outcomes at 8 weeks by study arm among children with a negative baseline malaria rapid diagnostic test (N=250)

|                                            | Azithromycin<br>(N=134) | Amoxicillin<br>(N=117) | Odds Ratio or Mean<br>Difference<br>(95% CI) | <i>P</i> -value |
|--------------------------------------------|-------------------------|------------------------|----------------------------------------------|-----------------|
| Positive rapid diagnostic test for malaria | 12 (9.0%)               | 15 (12.9%)             | 0.66 (0.29 to 1.48)                          | 0.32            |
| Fever (tympanic temperature >37.5°C)       | 7 (5.2%)                | 5 (4.3%)               | 1.23 (0.38 to 4.27)                          | 0.73            |
| Positive RDT plus fever (>37.5°C)          | 6 (4.5%)                | 4 (3.4%)               | 1.32 (0.37 to 5.29)                          | 0.67            |
| Hemoglobin, g/dl <sup>1</sup>              | 9.2 (1.1)               | 9.3 (1.5)              | -0.07 (-0.5 to 0.3)                          | 0.71            |
| Anemia (<11.0 g/dl) <sup>1</sup>           | 85 (93.4%)              | 68 (87.2%)             | 2.08 (0.74 to 6.39)                          | 0.18            |

<sup>1</sup>In subset with hemoglobin measurements (N=169)

Supplemental Figure 1. CONSORT flow diagram

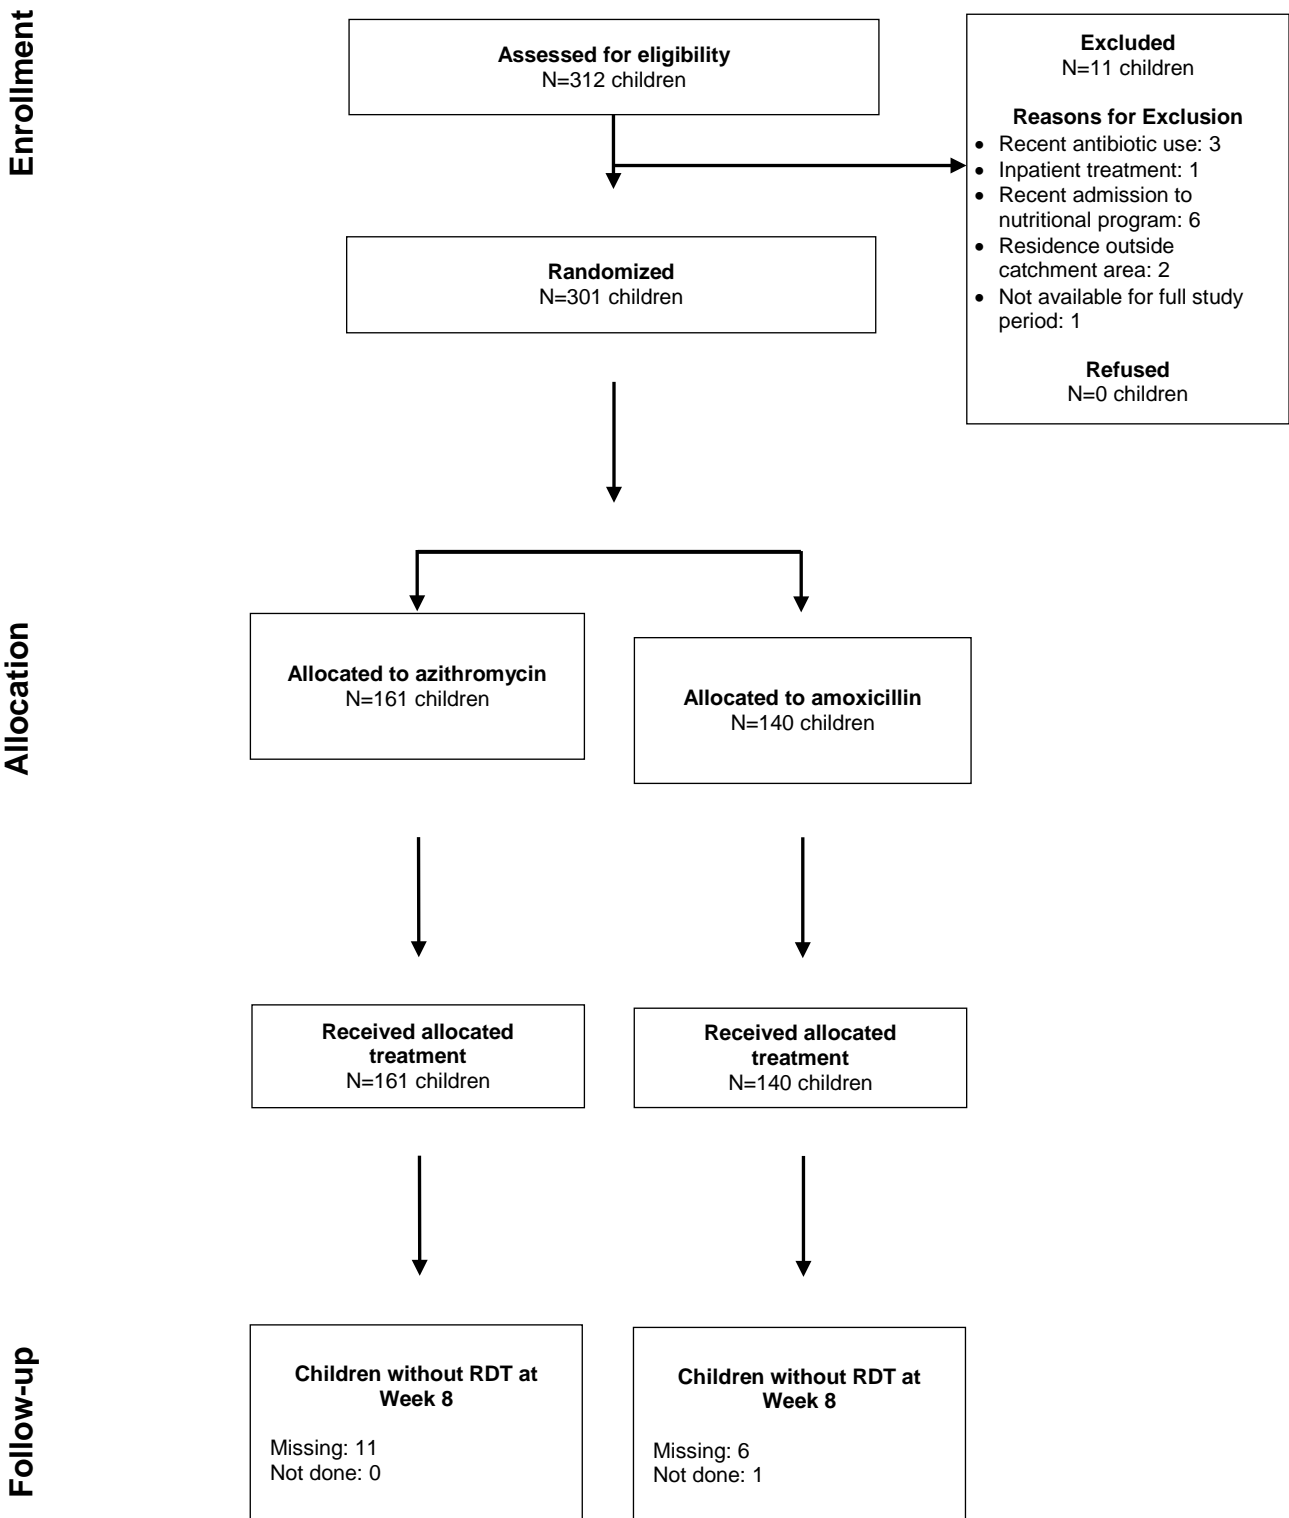

**Analysis**

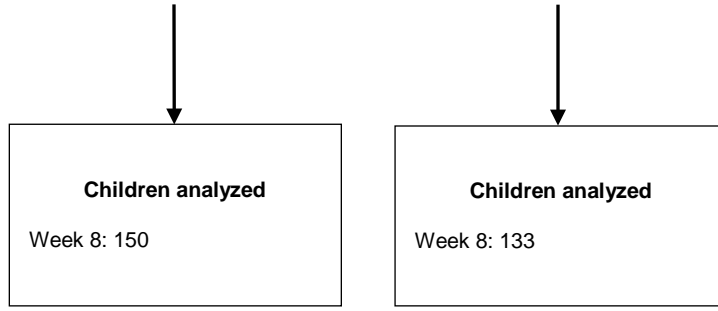

Supplement: tpmd210595.SD1.pdf [file tpmd210595.SD1.pdf]
